# Supplementary material
Source: Springer Nature journal article supplement (https://www.springermedizin.de/resource/supplementary/12899_2010_168_MOESM14_ESM.pdf/9514586)
Supplement: MOESM14 [file 9514586]

**Table 3.** Regulatory factors involved in the coagulation cascade and lipid metabolism in zebrafish and mammalian obesity

| Coagulation cascade | Zebrafish |                   | Rat     |                   | Mouse   |                   | Human   |                   |
|---------------------|-----------|-------------------|---------|-------------------|---------|-------------------|---------|-------------------|
| Regulatory factor   | p-value   | Rank <sup>a</sup> | p-value | Rank <sup>a</sup> | p-value | Rank <sup>a</sup> | p-value | Rank <sup>a</sup> |
| APOH                | 1.9E-08   | 1                 | 8.4E-16 | 1                 | 2.4E-12 | 2                 | 9.1E-11 | 4                 |
| IL-6                | 4.6E-05   | 3                 | 6.5E-10 | 5                 | 8.2E-09 | 7                 | 4.5E-10 | 6                 |
| IL-1 $\beta$        | 7.0E-05   | 6                 | 1.2E-08 | 8                 | 1.6E-07 | 16                | 8.4E-09 | 9                 |

| Lipid metabolism  | Zebrafish |                   | Rat     |                   | Mouse   |                   | Human   |                   |
|-------------------|-----------|-------------------|---------|-------------------|---------|-------------------|---------|-------------------|
| Regulatory factor | p-value   | Rank <sup>a</sup> | p-value | Rank <sup>a</sup> | p-value | Rank <sup>a</sup> | p-value | Rank <sup>a</sup> |
| PPAR $\alpha$     | 1.6E-10   | 1                 | 1.1E-23 | 1                 | 9.1E-19 | 1                 | 6.9E-24 | 1                 |
| PPAR $\gamma$     | 1.7E-10   | 2                 | 1.7E-15 | 3                 | 2.1E-14 | 2                 | 1.1E-16 | 3                 |
| NR1H3             | 1.0E-06   | 5                 | 1.6E-15 | 2                 | 2.7E-12 | 5                 | 5.8E-17 | 2                 |
| LEP               | 1.8E-05   | 9                 | 4.1E-10 | 13                | 3.7E-09 | 8                 | 3.6E-12 | 10                |
| SREBF1            | 1.8E-03   | 36                | 2.8E-13 | 7                 | 5.7E-10 | 7                 | 9.9E-10 | 15                |

<sup>a</sup>Regulatory factors are ranked based on the p-value in each dataset.

Regulatory factors ranked within the top 15 in at least three datasets are shown in this table.
